# Supplementary material for: Flufenamic Acid, a Promising Agent for the Sensitization of Colistin-Resistant Gram-Negative Bacteria to Colistin
Source: PubMed Central journal article supplement (PMC10100705; doi:10.1128/spectrum.04052-22), 2023-03-27
Supplement: spectrum.04052-22-s0001.pdf [file spectrum.04052-22-s0001.pdf]

**Table S1** Patient's clinical data and characteristics of analyzed strains.

| <b>Species</b>       | <b>Strains</b> | <b>Isolation<br/>Date</b> | <b>Age</b> | <b>Gender</b> | <b>Sample</b>  | <b>Ward</b>              |
|----------------------|----------------|---------------------------|------------|---------------|----------------|--------------------------|
| <i>P. aeruginosa</i> | TL1671         | 11/04/2015                | 74         | M             | Wound          | Endocrinology            |
|                      | TL1736         | 20/05/2015                | 44         | M             | Sputum         | Neurosurgery             |
|                      | TL1744         | 23/05/2015                | 63         | M             | Sputum         | ICU                      |
|                      | TL2314         | 08/03/2016                | 66         | M             | Sputum         | ICU                      |
|                      | TL2917         | 09/02/2017                | 58         | M             | Sputum         | ICU                      |
|                      | TL2967         | 13/03/2017                | 26         | M             | Sputum         | Emergency                |
|                      | TL3008         | 05/04/2017                | 67         | M             | Sputum         | Neurosurgery             |
|                      | TL3086         | 24/05/2017                | 65         | M             | Sputum         | Neurosurgery             |
|                      | DC90           | 27/03/2012                | 76         | M             | Wound          | Gastrointestinal Surgery |
| <i>E. coli</i>       | DC3539         | 19/1/2015                 | 74         | M             | Sputum         | Neurosurgery             |
|                      | DC3599         | 13/04/2015                | 72         | M             | Sputum         | Respiratory              |
|                      | DC3806         | 19/05/2015                | 17         | F             | Sputum         | Hematology               |
|                      | DC3846         | 28/05/2015                | 77         | F             | Urine          | Urology                  |
|                      | DC4887         | 23/02/2016                | 63         | M             | Urine          | Urology                  |
|                      | DC5286         | 23/05/2016                | 82         | F             | Urine          | Endocrinology            |
|                      | DC7333         | 18/05/2016                | 32         | M             | Drainage fluid | ICU                      |
|                      | FK169          | 02/07/2012                | 79         | F             | Sputum         | General                  |
|                      | FK1342         | 06/07/2014                | 21         | F             | Fester         | Gastrointestinal Surgery |
| <i>K. pneumoniae</i> | FK1913         | 19/01/2015                | 74         | M             | Sputum         | Neurosurgery             |

---

|                     |        |            |    |   |        |               |
|---------------------|--------|------------|----|---|--------|---------------|
|                     | FK1986 | 03/03/2015 | 44 | M | Blood  | Endocrinology |
|                     | FK3810 | 17/03/2017 | 21 | F | Stool  | ICU           |
|                     | FK3994 | 19/05/2017 | 69 | M | Sputum | Nephrology    |
|                     | FK6556 | 02/11/2015 | 68 | M | Sputum | CCU           |
|                     | FK6663 | 04/05/2019 | 73 | M | Stool  | ICU           |
|                     | BM1539 | 13/02/2014 | 48 | M | Sputum | ICU           |
|                     | BM1595 | 03/04/2014 | 57 | F | Sputum | ICU           |
|                     | BM2349 | 17/02/2015 | 68 | F | Sputum | ICU           |
| <i>A. baumannii</i> | BM2370 | 28/02/2015 | 59 | F | Sputum | ICU           |
|                     | BM2412 | 17/03/2015 | 63 | F | Sputum | ICU           |
|                     | BM2431 | 24/03/2015 | 89 | M | Sputum | ICU           |
|                     | BM2622 | 02/06/2015 | 59 | M | Sputum | RICU          |

---

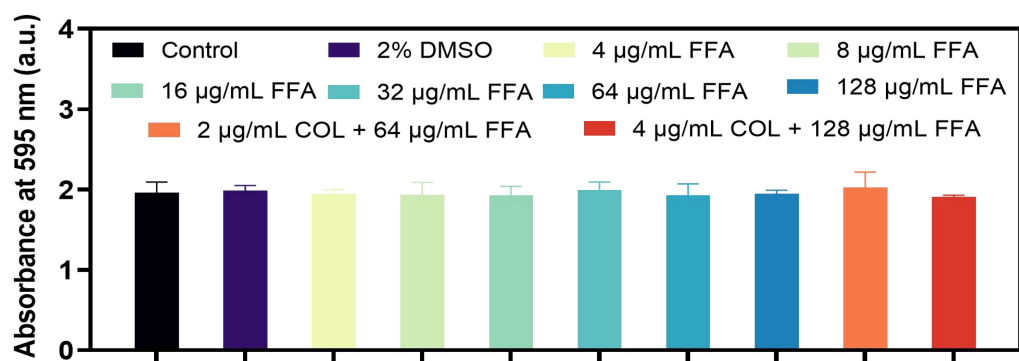

Figure S1 Cytotoxicity of different FFA concentrations and DMSO (2%) measured in RAW264.7 murine macrophages. Data were analyzed using Student's t-test and represent means  $\pm$  SD from triplicate analyses. DMSO: dimethyl sulfoxide.
